# Supplementary material for: Direct foliar phosphorus uptake from wildfire ash
Source: Copernicus journal article supplement (doi:10.5194/egusphere-2023-2617), 2023-11-24
Supplement: Supplementary file 1 [file egusphere-2023-2617-supplement.pdf]

# Main supplementary figures and tables

This document contains 1 figure and 6 tables submitted as supplementary to the manuscript titled *Direct foliar phosphorus uptake from wildfire ash*, by Lokshin et al.

## Contents

|                                                                                                                                             |          |
|---------------------------------------------------------------------------------------------------------------------------------------------|----------|
| <b>Figure S1 - fractionation of fire ash as it was done using a sequential extraction procedure following a modified Hedley scheme.....</b> | <b>2</b> |
| <b>Table S1 – XRD and XRF data of the fire ash particles.....</b>                                                                           | <b>3</b> |
| <b>Table S2 – ICP-MS data of the control plants, fertilizers and fire ash particles .....</b>                                               | <b>4</b> |
| <b>Table S3 – ICP-MS data of the foliar treated plants .....</b>                                                                            | <b>5</b> |
| <b>Table S4 – ICP-MS data of the root treated plants .....</b>                                                                              | <b>6</b> |
| <b>Table S5 – Leaf pH .....</b>                                                                                                             | <b>7</b> |
| <b>Table S6 – Plant’s holding capacity of fire ash particles.....</b>                                                                       | <b>8</b> |

**Figure S1 - fractionation of fire ash as it was done using a sequential extraction procedure following a modified Hedley scheme**

The dissolution of fire ash particles by HCl (red), H<sub>2</sub>NaCO<sub>3</sub> (orange) and NaOH (green) acids. According to these results, most of the P inside a fire ash is found in a Ca-P complexes. A significant portion (21%) is classified as labile P which readily dissolves when exposed to a weak base.

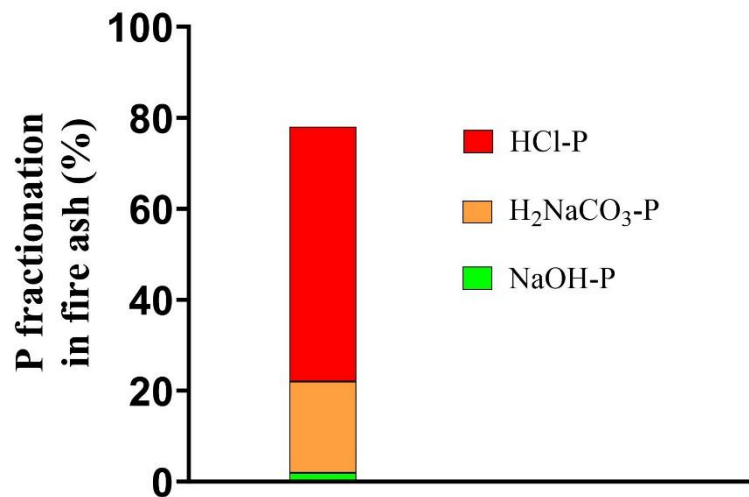

**Table S1 – XRD and XRF data of the fire ash particles**

| <b>XRD - fire ash sample</b>                                            | <b>%</b> |
|-------------------------------------------------------------------------|----------|
| Calcite ( $\text{CaCO}_3$ )                                             | 80       |
| Hibschite ( $(\text{Ca,Fe})_3(\text{Al,Fe})_2\text{SiO}_4(\text{OH})$ ) | 1.4      |
| Larnite/orthosilicate ( $\text{Ca}_2(\text{SiO}_4)$ )                   | 17.4     |
| Analcime ( $\text{K}_8\text{Al}_8\text{Si}_{16}\text{O}_{48}$ )         | 1.2      |
| Possible trace sulfates and/or phosphates                               | <0.5%    |

**XRF - fire ash sample**

| <b>Element</b> | <b>Conc.<br/>(%)</b> |
|----------------|----------------------|
| O              | 31.8                 |
| Na             | 0.1                  |
| Mg             | 0.7                  |
| Al             | 1.3                  |
| Si             | 4.4                  |
| P              | 1.0                  |
| S              | 1.3                  |
| Cl             | 2.2                  |
| K              | 5.2                  |
| Ca             | 48                   |
| Ti             | 0.3                  |
| Cr             | 0.0                  |
| Mn             | 0.1                  |
| Fe             | 2.9                  |
| Ni             | 0.0                  |
| Cu             | 0.0                  |
| Zn             | 0.1                  |
| Br             | 0.0                  |
| Rb             | 0.0                  |
| Sr             | 0.2                  |
| Zr             | 0.0                  |
| Ba             | 0.0                  |

**Table S2 – ICP-MS data of the control plants, fertilizers and fire ash particles****Foliar application experiment****412 ppm chamber**

| sample (ppm)    | Biomass | Mg   | P   | K     | Ca   | Mn | Fe  | Ni  | Cu   | Zn |
|-----------------|---------|------|-----|-------|------|----|-----|-----|------|----|
| Control 412 #1  | 1.03    | 2749 | 715 | 21928 | 7257 | 52 | 75  | 1.3 | 2.9  | 23 |
| Control 412 #2  | 1.29    | 2828 | 860 | 21147 | 7266 | 45 | 112 | 2.3 | 10.8 | 24 |
| Discarded plant |         |      |     |       |      |    |     |     |      |    |
| Control 412 #4  | 1.51    | 2814 | 686 | 23832 | 7462 | 33 | 97  | 2.4 | 3.7  | 22 |
| Control 412 #5  | 1.38    | 2863 | 663 | 21883 | 7684 | 38 | 94  | 1.0 | 2.7  | 24 |
| Control 412 #6  | 1.61    | 2513 | 704 | 19705 | 6531 | 19 | 69  | 1.3 | 3.3  | 23 |

**850 ppm chamber**

|                 |      |      |     |       |      |    |    |     |     |    |
|-----------------|------|------|-----|-------|------|----|----|-----|-----|----|
| Control 850 #1  | 1.35 | 2585 | 727 | 23099 | 6323 | 22 | 71 | 1.0 | 1.9 | 23 |
| Control 850 #2  | 1.16 | 3848 | 827 | 27768 | 7922 | 61 | 79 | 0.2 | 2.8 | 39 |
| Control 850 #3  | 1.79 | 2785 | 607 | 20121 | 7118 | 50 | 67 | 1.2 | 2.5 | 25 |
| Discarded plant |      |      |     |       |      |    |    |     |     |    |
| Control 850 #5  | 1.51 | 2847 | 759 | 27272 | 7572 | 21 | 88 | 2.2 | 4.7 | 26 |
| Control 850 #6  | 1.68 | 3180 | 640 | 24460 | 8732 | 31 | 93 | 1.6 | 2.9 | 29 |

**Root application experiment****412 ppm chamber**

| sample (ppm)    | Biomass | Mg   | P   | K     | Ca    | Mn  | Fe  | Ni  | Cu  | Zn |
|-----------------|---------|------|-----|-------|-------|-----|-----|-----|-----|----|
| Control 412 #1  | 1.04    | 2993 | 862 | 20480 | 6808  | 64  | 118 | 1.7 | 5.7 | 37 |
| Control 412 #2  | 1.95    | 5733 | 707 | 30854 | 10567 | 63  | 119 | 1.3 | 4.7 | 58 |
| Control 412 #3  | 1.28    | 4865 | 567 | 29117 | 11069 | 57  | 123 | 2.0 | 7.4 | 64 |
| Control 412 #4  | 1.46    | 4485 | 720 | 28665 | 10389 | 66  | 131 | 1.0 | 5.2 | 61 |
| Control 412 #5  | 1.67    | 5666 | 740 | 29223 | 11566 | 104 | 101 | 0.9 | 5.0 | 64 |
| Discarded plant |         |      |     |       |       |     |     |     |     |    |

**850 ppm chamber**

|                 |      |      |     |       |      |    |    |     |     |    |
|-----------------|------|------|-----|-------|------|----|----|-----|-----|----|
| Control 850 #1  | 1.09 | 3747 | 762 | 27685 | 8279 | 58 | 98 | 0.2 | 3.4 | 49 |
| Lost sample     |      |      |     |       |      |    |    |     |     |    |
| Discarded plant |      |      |     |       |      |    |    |     |     |    |
| Control 850 #4  | 1.44 | 4741 | 820 | 31501 | 9608 | 62 | 77 | 0.2 | 3.2 | 55 |
| Control 850 #5  | 1.46 | 3692 | 820 | 25098 | 7757 | 56 | 64 | 0.1 | 2.6 | 48 |
| Control 850 #6  | 0.97 | 3015 | 712 | 19211 | 7511 | 37 | 69 | 0.1 | 2.6 | 35 |

**Fertilizers and dust types**

|                   |  |       |      |       |        |     |      |     |     |     |
|-------------------|--|-------|------|-------|--------|-----|------|-----|-----|-----|
| +P fertilizer     |  | 1226  | 713  | 6000  | 10.6   | 76  | 151  | 0.4 | 5.6 | 50  |
| -P fertilizer     |  | 1214  | 35   | 7808  | 6.7    | 70  | 136  | 0.4 | 5.1 | 48  |
| Fire ash sample 1 |  | 22591 | 6070 | 23910 | 238430 | 510 | 7283 | 13  | 75  | 242 |
| Fire ash sample 2 |  | 23152 | 6248 | 24542 | 245073 | 526 | 7508 | 14  | 78  | 244 |

**Table S3 – ICP-MS data of the foliar treated plants****412 ppm room**

| sample (ppm)                       | Biomass | Mg   | P   | K     | Ca   | Mn | Fe  | Ni  | Cu  | Zn |
|------------------------------------|---------|------|-----|-------|------|----|-----|-----|-----|----|
| Fire ash foliar-treated 412 ppm #1 | 2.35    | 2552 | 691 | 22993 | 7034 | 38 | 106 | 0.8 | 3.1 | 33 |
| Fire ash foliar-treated 412 ppm #2 | 2.24    | 2584 | 654 | 20730 | 7347 | 32 | 64  | 0.8 | 2.7 | 19 |
| Discarded plant                    |         |      |     |       |      |    |     |     |     |    |
| Fire ash foliar-treated 412 ppm #4 | 1.72    | 2173 | 660 | 18840 | 5879 | 31 | 65  | 0.9 | 2.7 | 21 |
| Fire ash foliar-treated 412 ppm #5 | 1.71    | 2534 | 746 | 20654 | 6904 | 38 | 88  | 1.7 | 2.9 | 23 |
| Fire ash foliar-treated 412 ppm #6 | 2.66    | 2285 | 642 | 21986 | 6732 | 44 | 114 | 1.3 | 4.5 | 19 |

**850 ppm room**

| sample (ppm)                       | Biomass | Mg   | P   | K     | Ca   | Mn | Fe | Ni  | Cu  | Zn |
|------------------------------------|---------|------|-----|-------|------|----|----|-----|-----|----|
| Fire ash foliar-treated 850 ppm #1 | 1.89    | 2458 | 590 | 22706 | 7151 | 47 | 93 | 1.4 | 2.5 | 20 |
| Fire ash foliar-treated 850 ppm #2 | 2.33    | 2407 | 623 | 23189 | 6929 | 41 | 82 | 0.6 | 2.7 | 18 |
| Fire ash foliar-treated 850 ppm #3 | 1.07    | 2510 | 751 | 22602 | 6849 | 24 | 57 | 0.9 | 2.4 | 23 |
| Fire ash foliar-treated 850 ppm #4 | 2.39    | 2084 | 586 | 20249 | 6200 | 31 | 98 | 1.2 | 3.4 | 19 |
| Discarded plant                    |         |      |     |       |      |    |    |     |     |    |
| Fire ash foliar-treated 850 ppm #6 | 1.54    | 2503 | 685 | 22349 | 7414 | 32 | 79 | 0.6 | 2.0 | 18 |

**Table S4 – ICP-MS data of the root treated plants**

**412 ppm room**

| sample (ppm)                     | Biomass | Mg   | P   | K     | Ca    | Mn | Fe  | Ni  | Cu   | Zn |
|----------------------------------|---------|------|-----|-------|-------|----|-----|-----|------|----|
| Fire ash root treated 412 ppm #1 | 1.21    | 3279 | 883 | 34888 | 7383  | 39 | 81  | 2.2 | 29.1 | 38 |
| Fire ash root treated 412 ppm #2 | 1.47    | 4059 | 489 | 27365 | 8318  | 42 | 77  | 1.2 | 53.1 | 37 |
| Fire ash root treated 412 ppm #3 | 1.59    | 4735 | 905 | 27677 | 8561  | 51 | 93  | 0.9 | 4.6  | 45 |
| Fire ash root treated 412 ppm #4 | 1.58    | 5071 | 619 | 33414 | 9820  | 49 | 84  | 0.9 | 4.8  | 49 |
| Fire ash root treated 412 ppm #5 | 1.33    | 5121 | 828 | 38921 | 11100 | 75 | 109 | 0.9 | 4.9  | 70 |
| Discarded plant                  |         |      |     |       |       |    |     |     |      |    |

**850 ppm room**

| sample (ppm)                     | Biomass | Mg   | P   | K     | Ca   | Mn | Fe | Ni  | Cu  | Zn |
|----------------------------------|---------|------|-----|-------|------|----|----|-----|-----|----|
| Discarded plant                  |         |      |     |       |      |    |    |     |     |    |
| Fire ash root treated 850 ppm #2 | 1.56    | 2687 | 640 | 26257 | 7146 | 50 | 67 | 0.2 | 2.9 | 39 |
| Fire ash root treated 850 ppm #3 | 1.44    | 3103 | 793 | 25534 | 7563 | 44 | 77 | 0.1 | 3.0 | 30 |
| Fire ash root treated 850 ppm #4 | 0.96    | 2239 | 689 | 20422 | 5736 | 30 | 68 | 0.1 | 2.1 | 23 |
| Fire ash root treated 850 ppm #5 | 1.21    | 2817 | 682 | 21645 | 6957 | 35 | 70 | 0.1 | 2.9 | 26 |
| Fire ash root treated 850 ppm #6 | 1.02    | 2465 | 662 | 23181 | 6889 | 36 | 86 | 0.2 | 2.7 | 26 |

**Table S5 – Leaf pH**

| plant #       | number of leaves measured | pH values |
|---------------|---------------------------|-----------|
| plant #<br>1  | leaf 1                    | 1.11      |
|               | leaf 2                    | 1.25      |
|               | leaf 3                    | 1.2       |
|               | leaf 4                    | 1.1       |
| plant #<br>2  | leaf 1                    | 1.19      |
|               | leaf 2                    | 1.1       |
|               | leaf 3                    | 1.16      |
|               | leaf 4                    | 1.19      |
| plant #<br>3  | leaf 1                    | 1.11      |
|               | leaf 2                    | 1.18      |
|               | leaf 3                    | 1.11      |
|               | leaf 4                    | 1.26      |
| plant #<br>4  | leaf 1                    | 1.09      |
|               | leaf 2                    | 1.13      |
|               | leaf 3                    | 1.12      |
| plant #<br>5  | leaf 1                    | 0.99      |
|               | leaf 2                    | 1.23      |
|               | leaf 3                    | 1.25      |
| plant #<br>6  | leaf 1                    | 1.26      |
|               | leaf 2                    | 1.2       |
|               | leaf 3                    | 1.26      |
| plant #<br>7  | leaf 1                    | 1.26      |
|               | leaf 2                    | 1.2       |
|               | leaf 3                    | 1.26      |
| plant #<br>8  | leaf 1                    | 1.26      |
|               | leaf 2                    | 1.2       |
|               | leaf 3                    | 1.26      |
| plant # 9     | leaf 1                    | 1.26      |
|               | leaf 2                    | 1.2       |
|               | leaf 3                    | 1.26      |
| plant #<br>10 | leaf 1                    | 1.26      |
|               | leaf 2                    | 1.2       |
|               | leaf 3                    | 1.26      |
| plant #<br>11 | leaf 1                    | 1.26      |
|               | leaf 2                    | 1.2       |
|               | leaf 3                    | 1.26      |
| plant #<br>12 | leaf 1                    | 1.26      |
|               | leaf 2                    | 1.2       |
|               | leaf 3                    | 1.26      |
|               | leaf 4                    | 1.2       |
| plant #<br>13 | leaf 1                    | 1.25      |
|               | leaf 2                    | 1.13      |
|               | leaf 3                    | 1.12      |
| plant #<br>14 | leaf 1                    | 1.11      |
|               | leaf 2                    | 1.11      |
|               | leaf 3                    | 1.11      |
| plant #<br>15 | leaf 1                    | 1.04      |
|               | leaf 2                    | 1.04      |
|               | leaf 3                    | 1.18      |
| plant #<br>16 | leaf 1                    | 1.06      |
|               | leaf 2                    | 1.16      |
|               | leaf 3                    | 1.15      |

**Table S6 – Plant’s holding capacity of fire ash particles**

| <b>Plant #</b> | <b>Number of branches tested</b> | <b>branch weight (~0.5 g) before fire ash application</b> | <b>branch weight after application of fire ash particles</b> | <b>total holding mass</b> |
|----------------|----------------------------------|-----------------------------------------------------------|--------------------------------------------------------------|---------------------------|
| plant # 1      | branch 1                         | 0.502                                                     | 0.618                                                        | 0.116                     |
|                | branch 2                         | 0.545                                                     | 0.666                                                        | 0.121                     |
|                | branch 3                         | 0.485                                                     | 0.586                                                        | 0.101                     |
| plant # 2      | branch 1                         | 0.511                                                     | 0.673                                                        | 0.162                     |
|                | branch 2                         | 0.499                                                     | 0.708                                                        | 0.209                     |
| plant # 3      | branch 1                         | 0.508                                                     | 0.662                                                        | 0.154                     |
|                | branch 2                         | 0.482                                                     | 0.597                                                        | 0.115                     |
| plant # 4      | branch 1                         | 0.433                                                     | 0.545                                                        | 0.112                     |
| plant # 5      | branch 1                         | 0.434                                                     | 0.524                                                        | 0.09                      |
| plant # 6      | branch 1                         | 0.453                                                     | 0.527                                                        | 0.074                     |
|                | branch 2                         | 0.481                                                     | 0.607                                                        | 0.126                     |
| plant # 7      | branch 1                         | 0.48                                                      | 0.63                                                         | 0.15                      |
|                | branch 2                         | 0.48                                                      | 0.65                                                         | 0.17                      |
| plant # 8      | branch 1                         | 0.525                                                     | 0.69                                                         | 0.165                     |
|                | branch 2                         | 0.49                                                      | 0.65                                                         | 0.16                      |
| plant # 9      | branch 1                         | 0.509                                                     | 0.645                                                        | 0.136                     |
|                | branch 2                         | 0.496                                                     | 0.644                                                        | 0.148                     |
|                | branch 3                         | 0.515                                                     | 0.675                                                        | 0.16                      |
| plant # 10     | branch 1                         | 0.512                                                     | 0.605                                                        | 0.093                     |
|                | branch 2                         | 0.526                                                     | 0.687                                                        | 0.161                     |
| plant # 11     | branch 1                         | 0.519                                                     | 0.641                                                        | 0.122                     |
|                | branch 2                         | 0.515                                                     | 0.642                                                        | 0.127                     |
| plant # 12     | branch 1                         | 0.506                                                     | 0.636                                                        | 0.13                      |
|                | branch 2                         | 0.525                                                     | 0.624                                                        | 0.099                     |
